# Supplementary material
Source: HighWire-hosted journal article supplement (https://pn.bmj.com/content/19/1/5)
Supplement: inline-supplementary-material-2 [file inline-supplementary-material-2.pdf]

# Rituximab in neurological disease: first infusion checklist

|                  |                                                        |
|------------------|--------------------------------------------------------|
| Patient Name:    | Indication: _____                                      |
| DOB:             | Usage (circle): emergency / elective                   |
| Hospital Number: | Duration (circle): single course / maintenance therapy |
|                  | Dose to be given: _____                                |

| <b>Mandatory pre-admission checklist – emergency and elective use:</b>                                                            |  |
|-----------------------------------------------------------------------------------------------------------------------------------|--|
| No contra-indications (active infection, hypersensitivity to rituximab, severe immunocompromise, severe heart disease)            |  |
| Patient information sheet provided and contraception discussed (in men and women)                                                 |  |
| Hepatitis B serology is negative. Or, if positive, gastroenterology opinion has been sought and anti-viral prophylaxis commenced. |  |
| Baseline full blood count, liver function tests and immunoglobulin levels available.                                              |  |

| <b>Desirable pre-admission checklist – elective use, not to delay treatment in emergency use:</b> |  |
|---------------------------------------------------------------------------------------------------|--|
| Review of immunisation history. All necessary vaccines given, including pneumococcal vaccine.     |  |
| Hepatitis C and HIV serology tested. Involvement of specialist if needed.                         |  |
| In high risk groups only: TB screening and VZV serology negative.                                 |  |
| Patient advised to withhold antihypertensive medication if appropriate.                           |  |

| <b>Day of infusion checklist – all patients:</b>                                                                             |  |
|------------------------------------------------------------------------------------------------------------------------------|--|
| Consent form signed.                                                                                                         |  |
| No evidence of active infection on history and examination (consider urine dipstick or additional investigations if needed). |  |
| Pregnancy test negative (if appropriate).                                                                                    |  |
| Rituximab and pre-medications prescribed (methylprednisolone 100mg IV, paracetamol and anti-histamine if needed).            |  |

Completed by: \_\_\_\_\_ Date: \_\_\_\_\_
